# Supplementary material for: Genome-Wide Identification and Characterization Analysis of WUSCHEL-Related Homeobox Family in Melon (Cucumis melo L.)
Source: MDPI journal article supplement (doi:10.3390/ijms241512326), 2023-08-01
Supplement: s1 [file s1]

Supplemental figure:

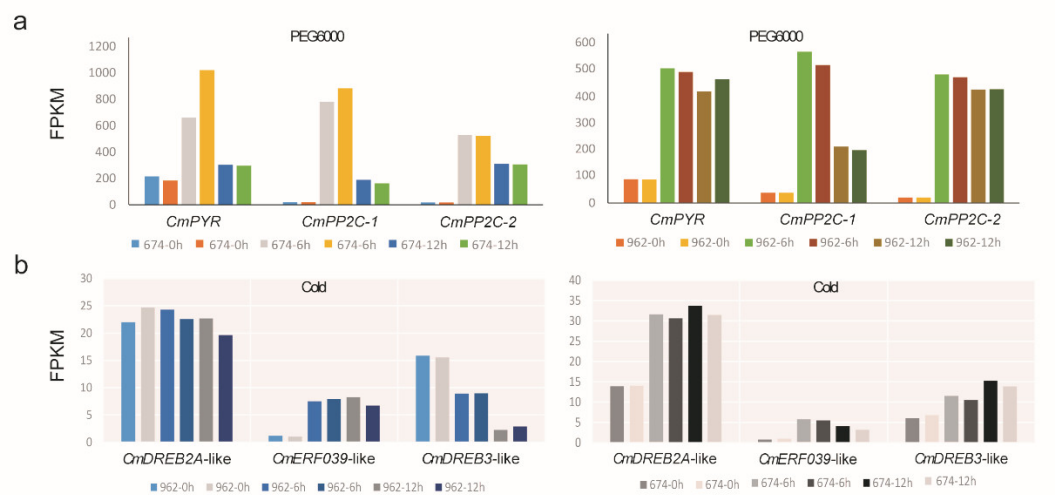

**Figure S1.** Transcript levels of ABA related genes and *CmDREB* -like genes.

**(a)** Transcript levels of ABA -related genes under PEG6000 of '674' and '962'. **(b)** Transcript levels of *CmDREB* -like genes under cold of '674' and '962'.
